1 **Cellular polarity asymmetrically functionalizes pathogen recognition**  
2 **receptor-mediated intrinsic immune response in human intestinal**  
3 **epithelium cells**

4

5 Megan L. Stanifer<sup>1,2#</sup>, Stephanie Muenchau<sup>1</sup>, Kalliopi Pervolaraki<sup>1</sup>, Takashi  
6 Kanaya<sup>3</sup>, Markus Mukenhirn<sup>1</sup>, Dorothee Albrecht<sup>1</sup>, Charlotte Odendall<sup>4</sup>, Jonathan  
7 Kagan<sup>5</sup>, Sina Bartfeld<sup>6</sup>, Hiroshi Ohno<sup>3</sup>, Steeve Boulant<sup>1,2#</sup>

8

9 <sup>1</sup> Schaller research group at CellNetworks, Department of Infectious  
10 Diseases, Virology, Heidelberg University Hospital, Germany;

11 <sup>2</sup>Research Group “Cellular polarity and viral infection”, German Cancer Research  
12 Center (DKFZ), Heidelberg, Germany;

13 <sup>3</sup> Laboratory for Intestinal Ecosystem, RIKEN Center for Integrative Medical  
14 Sciences, Yokohama, Kanagawa 230-0045, Japan

15 <sup>4</sup> Department of Infectious Diseases, King's College London, Guy's Hospital,  
16 London SE1 9RT, United Kingdom;

17 <sup>5</sup> Harvard Medical School and Division of Gastroenterology, Boston Children's  
18 Hospital, Boston, MA 02115, USA;

19 <sup>6</sup> Research Centre for Infectious Diseases, Institute for Molecular Infection  
20 Biology, Julius Maximilian University of Wuerzburg, Wuerzburg, Germany

21

22 Running Title: Polarized immune response in human intestinal epithelium cells

23

24

25 #Corresponding authors

26 Steeve Boulant, Ph.D.  
27 Department of Infectious Disease, Virology  
28 Schaller research group at CellNetworks and DKFZ  
29 Heidelberg Hospital University  
30 Im Neuenheimer Feld 344  
31 69120 Heidelberg, Germany  
32 Phone: +49 (0) 6221 56 7865  
33 Email: [s.boulant@dkfz.de](mailto:s.boulant@dkfz.de)

34

35 Megan L. Stanifer, Ph.D.  
36 Department of Infectious Disease, Virology  
37 Heidelberg Hospital University  
38 Im Neuenheimer Feld 344  
39 69120 Heidelberg, Germany  
40 Phone: +49 (0) 6221 56 7858  
41 Email: [m.stanifer@dkfz.de](mailto:m.stanifer@dkfz.de)

42

43

44 **Summary**

45 Intestinal epithelial cells (IECs) act as a physical barrier separating the  
46 commensal-containing intestinal tract from the sterile interior. These cells have  
47 found a complex balance allowing them to be prepared for pathogen attacks  
48 while still tolerating the presence of bacteria and viral stimuli present in the  
49 lumen of the gut. Using primary human IECs we probed the mechanisms used by  
50 cells to maintain this tolerance. We discovered that stimuli emanating from the  
51 basolateral side of IECs elicited a strong induction of the intrinsic immune  
52 system as compared to luminal apical stimulation. Additionally, we determined  
53 that this controlled apical response was driven by the clathrin-sorting adapter  
54 AP-1B. Mice and human IECs lacking AP-1B showed an exacerbated immune  
55 response following apical stimulation. Together these results suggest a model  
56 where the cellular polarity program plays an integral role in the ability of IECs to  
57 tolerate apical commensals and detect/fight invasive basolateral pathogens.

58

59 **Keywords:** Intrinsic innate immunity, type III interferon, TLR-3, MAVS, cellular  
60 polarity, clathrin, AP-1B, lambda interferon, enteric viruses, organoids, intestinal  
61 epithelial cells

62

63

## 64 **Introduction**

65           Intestinal epithelial cells (IECs) lining the gastrointestinal tract constitute  
66 the primary barrier separating us from the outside environment. The main role  
67 of this monolayer of cells is the uptake of nutrients; however, these cells also  
68 play a critical role in protecting the human body from enteric bacterial and viral  
69 pathogens (Peterson and Artis, 2014). IECs sense and combat pathogen  
70 invasions using Pathogen Recognition Receptors (PRRs) to trigger an intrinsic  
71 innate immune response, e.g. the Toll-like receptors (TLRs) and RIG-like  
72 receptors (RLRs) (Pott and Hornef, 2012, Fukata and Arditi, 2013, Arpaia and  
73 Barton, 2011, Barton and Medzhitov, 2003). However, unlike professional  
74 immune cells, IECs are in constant contact with the ever-present luminal  
75 microbiota and therefore must have developed mechanisms to tolerate the  
76 presence of the commensal bacteria while maintaining responsiveness against  
77 pathogen challenges (Fukata and Arditi, 2013). This finely tuned balance has  
78 been of interest in the recent years as uncontrolled responses by the epithelium  
79 can lead to inflammatory bowel disorders (Pott and Hornef, 2012). The cellular  
80 intrinsic innate immune response is regulated not only by complex signal  
81 transduction pathways downstream of PRRs but also by compartmentalization  
82 of these receptors (Odendall and Kagan, 2017, Chow et al., 2015). This  
83 compartmentalization is described to be an important mechanism by which cells  
84 avoid self-recognition (Yu and Gao, 2015, Kagan and Barton, 2014). In IECs, this  
85 compartmentalization of innate immune functions is believed to be even more  
86 critical to control the inflammatory state of cells and to maintain gut homeostasis  
87 (Yu and Gao, 2015). IECs are polarized, they display a unique apical membrane  
88 facing the lumen of the gut and a basolateral membrane facing the lamina

89 propria (Yu and Gao, 2015, Rodriguez-Boulan and Macara, 2014). The  
90 localization of membrane residing TLRs in IECs has been of interest in recent  
91 years. However, due to the complex structure of TLRs, good antibodies have  
92 been hard to produce leading to conflicting results over the precise localization  
93 of TLRs seen in immunohistochemistry and immunofluorescence stainings of  
94 tissues and immortalized IEC lines. To overcome these limitations, a recent study  
95 has fluorescently tagged endogenous intestinal TLRs and shown that contrary to  
96 past results, many TLRs are found on both the apical and basolateral membrane  
97 of epithelial cells from intestine and colon. However, whether the TLRs located at  
98 the apical vs. the basolateral plasma membrane of these epithelial cells display  
99 similar downstream signaling and induced pro-inflammatory response remains  
100 to be determined (Price et al., 2018).

101         While the polarized localization of TLRs specialized in sensing bacteria  
102 and their activation has been explored in IECs, how viruses are detected and  
103 combatted in the human intestinal epithelium has been largely understudied.  
104 Similarly, whether PRRs specialized in sensing viruses and whether other PRRs  
105 specialized in sensing cytosolic pathogen associated molecular pattern (PAMPs)  
106 (e.g. RLRs) also display a polarized intracellular location within IECs to adapt  
107 their response to the side of viral pathogen challenge (apical vs. basolateral)  
108 remains to be carefully addressed.

109         In our study, using human derived intestinal organoids, we investigated  
110 whether intestinal epithelial cells could distinguish viral infections emanating  
111 from either the apical or basolateral membrane. We determined that the viral  
112 ability to replicate and produce progeny virions was side specific. We observed

113 that an apical infection leads to a greater production of *de novo* viruses  
114 compared to a basolateral infection. Concomitantly, we found that a basolateral  
115 infection leads to a higher intrinsic innate immune response compared to an  
116 apical infection. Importantly, this higher basolateral innate immune induction  
117 appears to be a general mechanism as it was neither cell type, virus nor  
118 pathogen associated molecular pattern specific. Using mouse derived organoids  
119 and knock-down approaches, we determined that mechanisms leading to the  
120 establishment of cellular polarity in IECs were key to control the observed  
121 polarized immune response. This discovery of a global polarized immune  
122 response strongly suggests a universal mechanism used by intestinal epithelial  
123 cells to generate (1) a moderate immune response against microbe stimuli  
124 (bacterial and viral) emanating from the physiological luminal side while (2)  
125 remaining fully responsive against invasive pathogens or in conditions of barrier  
126 integrity loss where stimuli can access the normally sterile basolateral side.

127

128 **Results**

129 **Apical infection of human IECs leads to more *de novo* virus production**

130 **compared to basolateral infection.** Human intestinal epithelial cells (hIECs)

131 are polarized with an apical and basolateral membrane separated by tight

132 junctions (Weisz and Rodriguez-Boulan, 2009). Enteric pathogens and

133 commensals are normally located in the lumen of the gut thereby generally

134 challenging hIECs through their apical membrane. However, in some

135 circumstances, gut lesions and loss of barrier functions of the gut epithelium can

136 allow luminal microbes to pass the protective epithelium gaining access to the

137 basolateral side of hIECs. Alternatively, microbes, particularly enteric viruses can

138 be transcytosed by M cells allowing them to initiate infection from the

139 basolateral of hIECs (Wolf et al., 1981). To investigate whether the side of

140 infection of hIECs by viruses can impact the outcome of infection, replication,

141 and spread, we seeded human colon carcinoma-derived IECs, T84 cells, on

142 transwell inserts and allowed them to polarize and to form a tight epithelium-

143 like monolayer. As we previously reported (Stanifer et al., 2016), we confirmed

144 that these cells were polarized and display a full barrier function. Trans-

145 Epithelium Electrical Resistance (TEER) monitoring, which provides a

146 measurement of cellular monolayer tightness, showed that T84 cells reached

147 their polarized level (Madara et al., 1987) ( $1000 \text{ Ohm/cm}^2$ ) in five days post-

148 seeding (Sup. Figure 1A). This polarized phenotype was confirmed by

149 monitoring the integrity of the tight junction belt through immunostaining of the

150 tight junction protein ZO-1 (Sup. Figure 1B); and by controlling the capacity of a

151 monolayer of polarized T84 cells to block dextran diffusion from the apical to the

152 basolateral chamber in a transwell diffusion assay (Sup. Figure 1C).

153 Polarized T84 cells were infected either apically or basolaterally with  
154 mammalian reovirus (MRV), a model enteric virus (Figure 1A). Previous work in  
155 our lab has shown that the polarized nature of infected cells is maintained for  
156 several days post-infection (Stanifer et al., 2016). Immunostaining of the tight  
157 junction belt and TEER measurements further confirmed that infection by MRV  
158 did not disrupt the polarized nature of the cells (Sup. Figure 1A-B). MRV  
159 infection was followed over time by qRT-PCR of the MRV genome, as well as  
160 Western blot and immunofluorescence (IF) staining for the non-structural viral  
161 protein  $\mu$ NS (Figure 1B-D). Results show that infection of T84 cells initiated with  
162 a similar kinetics when cells were infected by MRV from their apical or  
163 basolateral side (Figure 1B-D). However, while IF staining revealed that the same  
164 number of cells were infected from both an apical or basolateral infection (Sup.  
165 Figure 1B and Figure 1B), quantification of virus replication by Western blot  
166 showed that an apical infection produced a larger quantity of the viral non-  
167 structural protein  $\mu$ NS at 24 hours post-infection (hpi) (Figure 1C). To determine  
168 if this excess  $\mu$ NS correlated with increased *de novo* viral production, T84 cells  
169 were infected with MRV apically or basolaterally and cells were collected in 24-  
170 hour intervals over four days. Virus production was then assayed by plaque  
171 assay and revealed that an apical infection led to a higher production of *de novo*  
172 viral particles compared to a basolateral infection (Figure 1E).

173



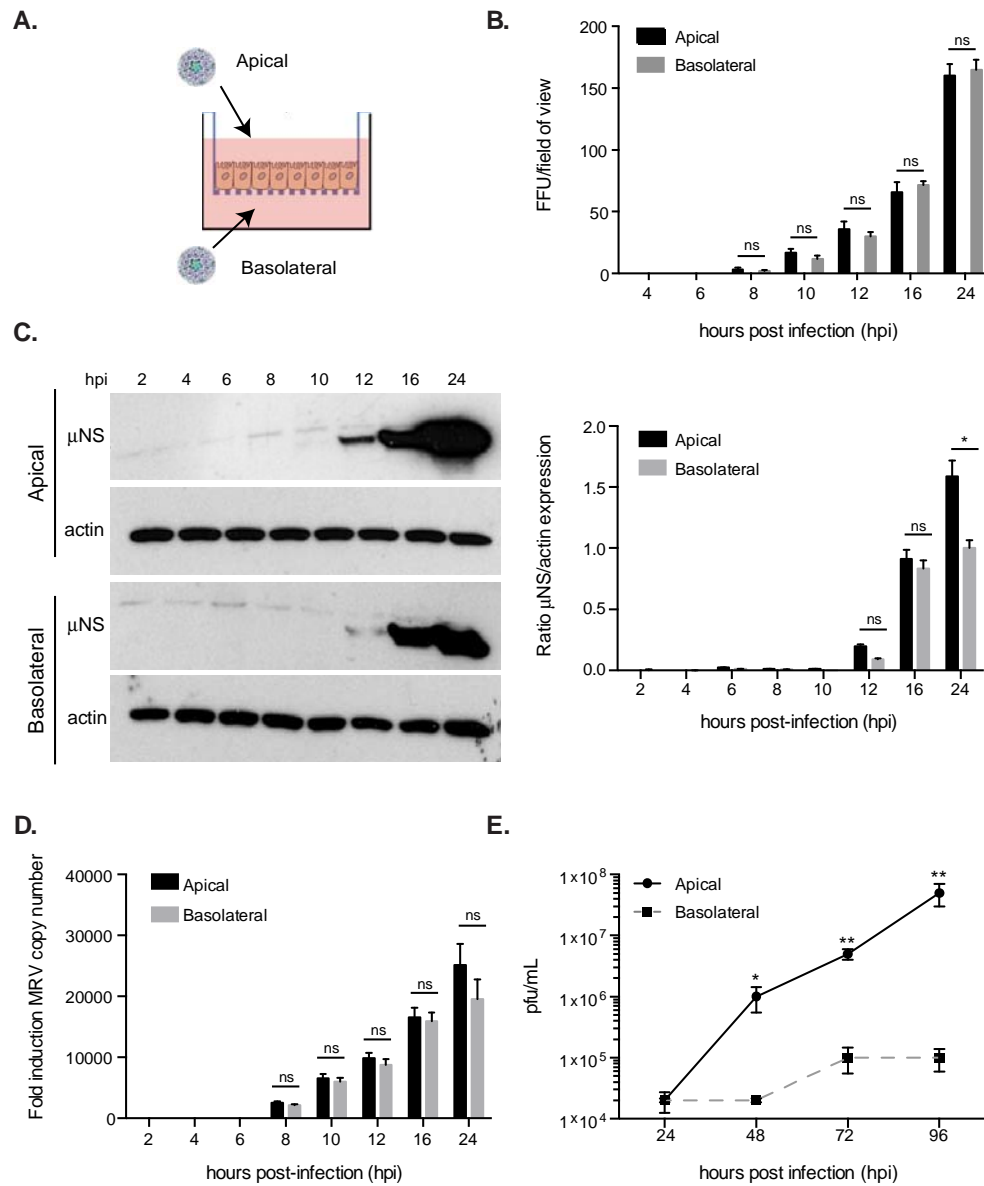

**Figure 1. Apical infection leads to more *de novo* MRV virus production compared to basolateral infection.** Polarized T84 cells were infected apically or basolaterally with MRV. (A). Schematic showing polarized cells grown on a transwell insert allowing us to access the apical and basolateral sides independently. (B). Infected cells were fixed at indicated time points and indirect immunofluorescence was performed against the non-structural protein  $\mu$ NS. 10 fields of view were counted for each time point. (C). Same as B except protein samples were subjected to Western blot of the MRV non-structural protein  $\mu$ NS. Actin was used as a loading control. Representative figure is shown. (D). Infected cells were collected at the indicated time points and RNA samples were assayed for the production of the MRV  $\mu$ 2 genome segment. (E). Infected cells and supernatants were collected in 24 hour intervals for five days. Samples were freeze/thawed and total *de novo* virus production was assessed by plaque assay. (B-E) Experiments were performed in triplicate, error bars indicate the standard deviation. ns=not significant, \* $P < 0.05$ , \*\* $P < 0.01$  (unpaired t-test)

175 **Polarized hIECS have a higher innate immune induction characterized by a**  
176 **prolonged type III IFN expression from basolateral infection/stimulation.**

177 Our results indicate that T84 cells can equally support infection from both their  
178 apical and basolateral membranes. However, over time, *de novo* virus production  
179 appears to be more constrained upon basolateral infection. We therefore  
180 investigated the source of this basolateral restriction and evaluated whether the  
181 intrinsic innate immune response generated by hIECs was different when  
182 infection emanated from their apical vs. their basolateral side. T84 cells were  
183 infected with MRV from their apical or basolateral side and their intrinsic innate  
184 immune response was monitored as we previously reported by evaluating the  
185 induction of either type I IFN (IFN $\beta$ 1) or type III IFN (INF $\lambda$ 2/3) 16 hpi by q-RT-  
186 PCR (Stanifer et al., 2016, Pervolaraki et al., 2017). Results showed that although  
187 there was a similar level of virus infectivity with a similar number of infected  
188 cells at early times post-infection (Figure 2A and Sup. Figure 2A), there was a  
189 significantly higher production of both IFN $\beta$ 1 and INF $\lambda$ 2/3 transcripts following a  
190 basolateral infection compared to an apical one (Figure 2A). Using an additional  
191 hIEC cell line, SKCO15 cells (Le Bivic et al., 1989), we confirmed that this  
192 phenotype was not cell type specific (Sup. Figure 2B-C). To verify that this  
193 phenotype was neither MRV nor virus specific, we infected our T84 cells in a  
194 polarized manner with *Encephalomyocarditisvirus* (EMCV) Mengovirus (Mengo)  
195 and *Salmonella enterica serovar typhimurium* (StM). Using indirect  
196 immunofluorescence, we confirmed that similar to MRV, Mengo and *S.*  
197 Typhimurium could equally infect T84 cells from their apical or basolateral sides  
198 (Figure 2B-C and Sup. Figure 2A). Interestingly, when either Mengo or *S.*  
199 Typhimurium infected cells were evaluated for their intrinsic innate immune

200 induction, we could show that a basolateral infection lead to a stronger  
201 production of both IFN $\beta$ 1 and INF $\lambda$ 2/3 compared to an apical infection (Figure  
202 2B-C).

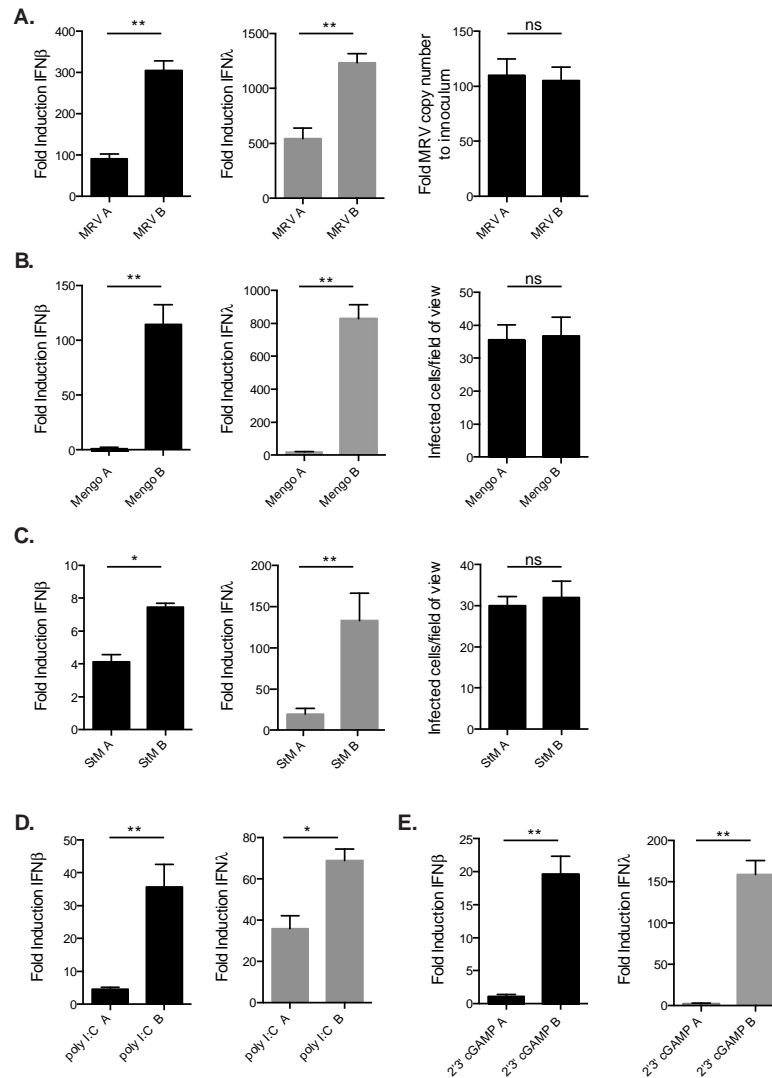

**Figure 2. Basolateral stimulation leads to a higher induction of both type I and III interferons.** T84 cells were seeded onto transwell inserts until they reached a polarized state. (A). T84 cells were infected with MRV either apically or basolaterally for 16h. Samples were collected and the induction of the intrinsic innate immune system was analyzed by qPCR for type I (IFN $\beta$ ) or type III (INF $\lambda$ 2/3) IFNs. Viral infection was determined by indirect immunofluorescence against the MRV non-structural protein  $\mu$ NS. (B) Same as A except using ECV Mengo. (C). Same as A except using *Salmonella*-mCherry (StM) and analyzing samples 8 hpi. (D) T84 cells were transfected apically or basolaterally with poly I:C. RNA was harvested and analyzed 6 hours post-treatment. (E) 2'3'cGAMP was added either to the apical or basolateral side of polarized T84 cells. RNA was harvested and analyzed 6 hours post-treatment. (A-E). All experiments were performed in triplicate. Error bars indicate the standard deviation. ns=not significant, \* $<P.05$ , \*\* $P < 0.01$  (unpaired t-test).

203           As pathogens often have mechanisms to interfere with the intrinsic innate  
204 immune response, we wanted to confirm that our polarized immune response  
205 was not the result of different inhibitory mechanisms developed by pathogens as  
206 a function of the entry side. For this we used transfected poly I:C, a mimicry of  
207 dsRNA commonly used to stimulate the Rig-Like receptor (RLR) pathway.  
208 Stimulation of polarized T84 cells with poly I:C revealed that the amplitude of  
209 the immune response was dependent on the treatment side. Cells stimulated  
210 from their basolateral side displayed a greater production of IFN compared to  
211 cells stimulated from their apical side (Figure 2D). Similarly, we used the  
212 synthetic analogs 2'3'cGAMP mimicking infection by a DNA virus or bacteria to  
213 specifically activate the STING pathway and could further confirm that T84 cells  
214 generate a polarized innate immune response. (Figure 2E). These results  
215 indicate that polarized T84 cells have an intrinsic mechanism allowing them to  
216 distinguish between invading pathogens or stimuli (PAMPs) emanating from  
217 their apical or basolateral side and, most importantly, that they can adapt their  
218 response to the entry side.

219 **Primary intestinal cells show a higher intrinsic immune response to viral**  
220 **stimuli.** T84 cells are immortalized carcinoma derived cells. Due to their  
221 cancerous nature, they are likely to display altered signal transduction pathways.  
222 Therefore, we then turned to non-transformed human mini-gut organoids to  
223 validate our findings in human primary cells. We have previously shown that  
224 human mini-gut organoids can be infected by MRV and mount an immune  
225 response which is characterized by the upregulation of both IFN $\beta$ 1 and  
226 INF $\lambda$ 2/3 (Pervolaraki et al., 2017). Human mini-gut organoids are large multi-

227 cellular structures, with the apical membrane of hIECs facing the luminal  
228 interior and their basolateral membrane facing the exterior environment. Using  
229 microinjection, MRV was introduced within the organoids to allow for apical  
230 infection or juxtaposed at the organoid periphery to promote basolateral  
231 infection (Figure 3A). We first validated that our apical and basolateral  
232 microinjection approaches led to equivalent infection of the human mini-gut  
233 organoids as controlled by western blot analysis against the MRV non-structural  
234 protein  $\mu$ NS and qRT-PCR of the viral genome (Figure 3B-C, right panel). Similar  
235 to our T84 cells, human mini-gut organoids also displayed a polarized immune  
236 response as shown by a higher induction of both IFN $\beta$ 1 and INF $\lambda$ 2/3 transcripts  
237 following basolateral infection (Figure 3C).

238         Due to their 3D nature, it is difficult to fully address, in organoids, the  
239 number of cells that get infected upon apical and basolateral infection. As such,  
240 we implemented a method to create a 2D monolayer out of the human mini-gut  
241 organoids (Figure 3D) (see method section for details). This allowed us to grow  
242 our mini-guts on transwell inserts thereby allowing us to gain specific and  
243 precise access to their apical or basolateral side independently. Primary hIECs  
244 grown on transwells were able to polarize as shown by the formation of a  
245 complete tight junction belt (ZO-1 staining, Figure 3E) and by the establishment  
246 of barrier function as measured by TEER (data not shown). These polarized  
247 primary hIECs were infected with MRV from their apical or basolateral side.  
248 Transcript analysis and immunostaining of the non-structural protein  $\mu$ NS  
249 showed that while infection levels were independent of the side of infection  
250 (Figure 3F, right panel), basolateral infection led to a higher induction of both

251 IFN $\beta$ 1 and IFN $\lambda$ 2/3 (Figure 3F) confirming the results obtained both using  
252 microinjection of organoids (Figure 3C) and in T84 cells (Figure 2A). All together

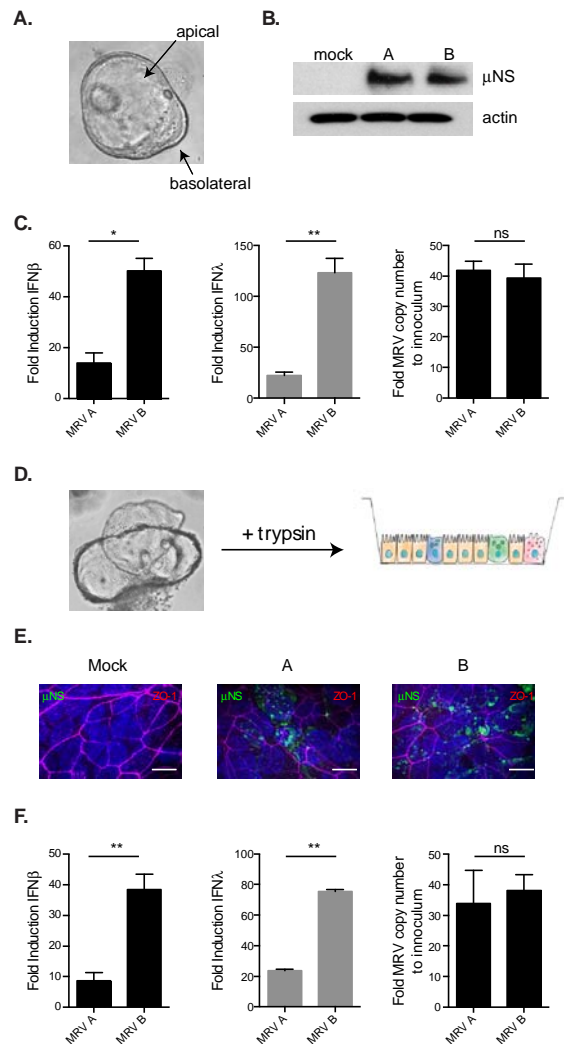

**Figure 3. Human organoids display a polarized intrinsic immune response.** (A) Schematic of the microinjection approach used to infect organoids specifically from either their apical or basolateral sides. (B-C) Human intestinal organoids were infected by MRV apically or basolaterally through microinjection. Virus infection was assessed 16 hpi for (B) the production of the non-structural viral protein  $\mu$ NS using Western blot analysis and (C) for the production of an intrinsic immune induction by quantifying the production of type I (IFN $\beta$ ) and type III (IFN $\lambda$ 2/3) interferons using qPCR. (D) Human colon organoids were seeded onto transwells and allowed to polarize for five days (see method for details). Polarized monolayers were infected with MRV apically or basolaterally and assessed 16 hpi for (E) viral infection and polarization by indirect immunofluorescence (green= $\mu$ NS, red=ZO-1, blue=DAPI) and (F) for the production of an intrinsic immune induction by quantifying the production of type I (IFN $\beta$ ) and type III (IFN $\lambda$ 2/3) interferons using qPCR. (B-F) All experiments were performed in triplicate. Representative immunofluorescence and western blot are shown. Error bars indicate the standard deviation. Scale bar =10 $\mu$ M. ns=not significant, \* $P$ <0.05, \*\* $P$ <0.01 (unpaired t-test).

253 these results demonstrate that human intestinal epithelial cells have developed  
254 mechanisms allowing them to generate a stronger innate immune response  
255 following stimulation emanating from their basolateral side compared to apical  
256 stimuli.

257 **Basolateral infection leads to prolonged production of type III IFN.** To  
258 evaluate the duration of this polarized response, polarized hIECs were infected  
259 with MRV and the upregulation of both IFN $\beta$ 1 and INF $\lambda$ 2/3 transcripts was  
260 evaluated over time. We found that an apical infection led to a rapid up and  
261 down regulation of both IFN $\beta$ 1 and INF $\lambda$ 2/3 transcripts (Figure 4A).  
262 Interestingly, we found that a basolateral infection also showed this same quick  
263 up and down regulation of the IFN $\beta$ 1 transcript, however expression of INF $\lambda$ 2/3  
264 transcript was sustained over time (Figure 4A). To confirm that the prolonged  
265 INF $\lambda$ 2/3 expression was also shown at the protein level, T84 cells were infected  
266 from either their apical or basolateral membrane and supernatants were  
267 collected over time for ELISA analysis (Stanifer et al., 2016). Our ELISA results  
268 confirm that an apical infection leads to an acute INF $\lambda$ 2/3 production and  
269 secretion while a basolateral infection leads to a greater and prolonged  
270 production and secretion of INF $\lambda$ 2/3 (Figure 4B). This prolonged INF $\lambda$ 2/3  
271 expression upon basolateral stimulation was also observed in cells treated with  
272 both poly I:C and cGAMP (Sup. Figure 3A-B, respectively). As this apparent  
273 prolonged production of type III IFN transcript could be due to a sustained  
274 transcriptional activity or an increased RNA stability, cells were treated with  
275 actinomycin to inhibit new RNA synthesis (Sup. Figure 4A). Upon actinomycin  
276 treatment, basolateral challenges produced IFN $\beta$ 1 and INF $\lambda$ 2/3 transcripts

277 whose half-life were slightly shorter than apical infections arguing that the  
 278 stronger immune response generated upon basolateral challenges is not the  
 279 results of differences in the stability of the IFN transcripts (Sup. Figure 4B). This  
 280 strongly suggests that an apical and a basolateral infection lead to different  
 281 transcriptional activities of IFNs with a basolateral infection leading to a  
 282 prolonged transcription of  $IFN\lambda 2/3$ .

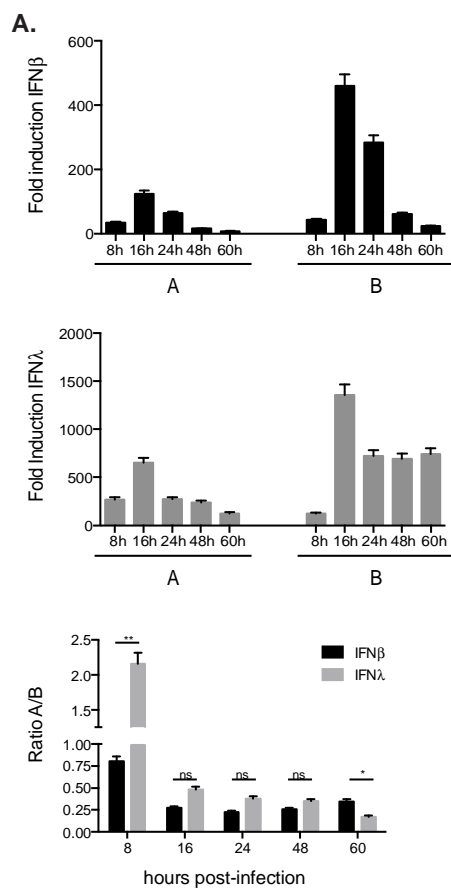

**Figure 4. Basolateral infection leads to a prolonged production of type III interferon.** (A) Polarized T84 cells were infected apically or basolaterally with MRV. RNA samples were collected at the indicated times post-infection and analyzed by qPCR for the intrinsic innate immune induction of type I ( $IFN\beta$ ) and type III ( $IFN\lambda 2/3$ ) interferons. (B). Polarized T84 cells were infected apically or basolaterally with MRV. Supernatants from the basolateral side were collected at the indicated times post-infection and analyzed by ELISA for the secretion of type III ( $IFN\lambda 2/3$ ) interferon. A=apical infection, basolateral supernatant. B =basolateral infection/basolateral supernatant (Stanifer et al., 2016). Black line indicates limit of detection. (A-B) All samples were performed in triplicate. Error bars indicate the standard deviation. ns=not significant, \* $<P.05$ , \*\* $P < 0.01$ , \*\*\* $P < 0.001$  (unpaired t-test).

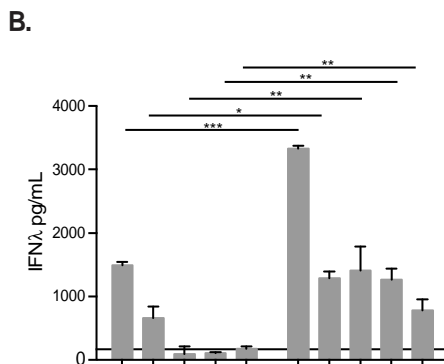



283 All together these results show that hIECs can detect pathogens entering  
284 from both their apical and basolateral sides but that basolateral stimulation  
285 induces a larger and sustained intrinsic immune response characterized by a  
286 greater production and secretion of type III IFNs.

287 **Apical stimulation of hIECs generates a negative signal, which down**  
288 **regulates the intrinsic innate immune response.** Our above results indicate  
289 that an apical infection is efficiently detected by hIECs and leads to the  
290 generation of an intrinsic innate immune response. However, opposite to  
291 basolateral stimulation, this response is quickly downregulated (Figure 4). To  
292 gain insight on the mechanism leading to this downregulation of immune  
293 response, cells were co-infected from both sides and immune response was  
294 compared to the one generated upon unilateral infection conditions.  
295 Immunofluorescence staining confirmed that a dual infection leads to an  
296 increased number of infected cells (Sup. Figure 5A-B). However, results show  
297 that co-infection of cells from their apical and basolateral side does not lead to an  
298 additive immune-stimulatory effect, but on the contrary, leads to a dampening of  
299 the immune induction compared to basolateral infection only (Sup. Figure 5C).  
300 These results show that while apical infection induces an acute immune  
301 response in hIECs, it is quickly followed by a global negative feedback signal  
302 which leads to the down regulation of the intrinsic innate immune response.

303 **The clathrin adapter AP-1B-mediated cellular polarity drives polarized**  
304 **immune response in IECs** Our observations made both in immortalized  
305 carcinoma derived cell lines and in primary human IECs demonstrate that  
306 polarized intestinal epithelial cells are able to distinguish and to adjust their

307 intrinsic innate immune response in a side dependent manner. Viral infection or  
308 pathogen challenges emanating from the basolateral side leads to a stronger  
309 immune response compared to apical stimuli. To identify the mechanisms  
310 driving this polarized immune response we reasoned that this unique response  
311 is intrinsically linked to the polarized nature of IECs. The apical and basolateral  
312 membranes are established through the coordinated sorting of both proteins and  
313 lipids, the polarization of both the actin and microtubule cytoskeleton, and the  
314 creation of a tight junction belt (Weisz and Rodriguez-Boulau, 2009, Gonzalez  
315 and Rodriguez-Boulau, 2009). Proteins are polarized due to unique sorting  
316 signals such as YXXØ (where Ø represents amino acids with a bulky hydrophobic  
317 side chain), NPXY and DXXLL for basolateral cargo or GPI anchors and modified  
318 transmembrane or cytosolic domains for apical cargo (De Matteis and Luini,  
319 2008). Currently the best-characterized basolateral sorting machinery is AP-1,  
320 which comes in two forms; the ubiquitously expressed AP-1A and the epithelial  
321 specific AP-1B. AP-1B has been described as being localized to the recycling  
322 endosomes (RE) and is a key protein involved in sorting proteins from the RE to  
323 the basolateral membrane (Folsch, 2015). Interestingly, AP-1B knock-out mice  
324 not only suffer from the loss of basolateral polarization (Hase et al., 2013) but  
325 also display an uncontrolled inflammatory response in the intestinal tract in the  
326 absence of infection (Takahashi et al., 2011).

327         To determine if AP-1B also played a role in pathogen induced sensing we  
328 created a T84 cell line in which AP-1B was depleted by shRNA against the  $\mu$ 1b  
329 subunit (AP-1B kd) (Sup. Figure 6A). TEER measurements and ZO-1 staining  
330 confirmed that T84 cells depleted of AP-1B maintained their tight junction

331 integrity (Sup. Figure 6B-C) (Gonzalez and Rodriguez-Boulan, 2009). These AP-  
332 1B knock-down cell lines were then seeded onto transwell inserts and  
333 challenged with MRV either from their apical or basolateral side. Interestingly,  
334 apical infection of the AP-1B knock-down cell lines lead to an exacerbated and  
335 prolonged  $INF\lambda_{2/3}$  production compared to wild type cells (Figure 5A). Similar  
336 results were found when monitoring  $INF\beta_1$  (data not shown). The increased  
337 production of type III interferon upon apical infection was also seen at the  
338 protein level through increased  $INF\lambda_{2/3}$  secretion into the supernatants (Sup.  
339 Figure 6D). These results strongly indicate that AP-1B is responsible for the  
340 polarized immune response observed in our hIECs during MRV infection.

341           Importantly, to determine whether the increased innate immune  
342 induction upon apical stimulation was based on initial virus sensing or due to  
343 downstream interferon signaling, WT and AP-1B knock-down T84 cells were  
344 treated apically or basolaterally with either  $IFN\beta$  or  $IFN\lambda$ . Results showed that  
345  $IFN\lambda$  activates STAT-1 phosphorylation and ISG production through both apical  
346 and basolateral stimulation. Importantly, this was unaltered when AP-1B was  
347 knocked-down (Sup. Figure 6E). Additionally,  $IFN\beta_1$  stimulation shows a  
348 polarized induction of immune response, with basolateral stimulation producing  
349 a much higher STAT-1 phosphorylation and ISG production, this was also  
350 unchanged when AP-1B was knocked-down strongly suggesting that AP-1B is  
351 acting on the level of virus sensing.

352

353

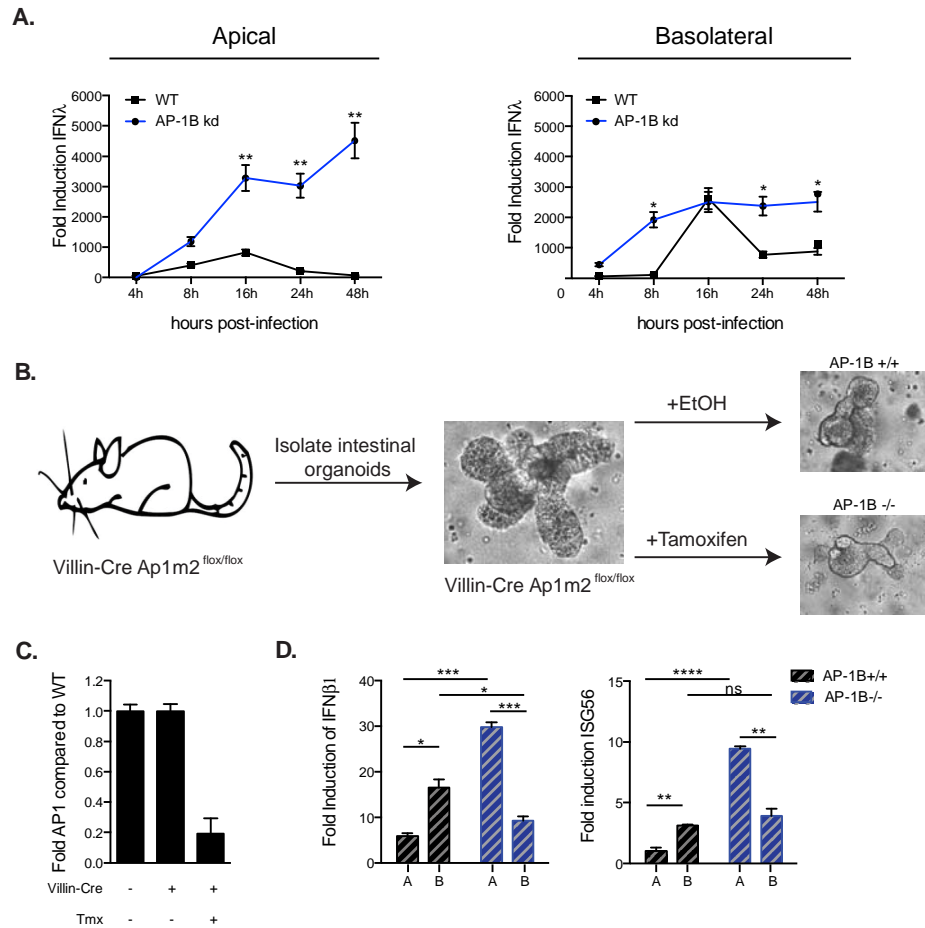

**Figure 5. AP-1B-mediated cellular polarity controls the polarized immune response.** (A) WT and AP-1B knock-down T84 cells were polarized on transwell inserts. Cells were infected with MRV apically or basolaterally. RNA samples were harvested at indicated time points post-infection and the intrinsic innate immune induction was analyzed by qPCR for type III (IFNλ2/3) interferon. (B) Schematic for the generation of the inducible murine AP-1B knock-out organoids. (C). AP-1B knock-out was controlled by qPCR for exon 4-5 of the Ap1m2 locus. (D) Non-tamoxifen treated Cre mice (AP-1B<sup>+/+</sup>) or AP-1B<sup>-/-</sup> mouse organoids were seeded onto transwells and infected with MRV in a polarized manner. 48 hours post-infection cells were harvested and analyzed for the induction of IFNβ1 and ISG56 by qRT-PCR. All experiments were performed in triplicate. Error bars indicate the standard deviation. ns=not significant, \**P* < 0.05, \*\**P* < 0.01, \*\*\* *P* < 0.001, \*\*\*\* *P* < 0.0001 (unpaired t-test).

354

355 To confirm that AP-1B was contributing to the observed polarized  
 356 immune response we evaluated mice, which express an inducible intestinal  
 357 specific knock-out of AP-1B (villin-Cre-Ap1m2<sup>flox/flox</sup>, (Takahashi et al., 2011))  
 358 (Figure 5B). Intestinal organoids were generated from these mice as polarized

359 infection is not possible using intact mice. While apical infection can be  
360 mimicked through gavaging of virus, basolateral infection cannot be controlled  
361 as intraperitoneal infection will also deliver virus to the surrounding immune  
362 cells and stroma cells thereby resulting in an immune response generated not  
363 only by IECs but also by other cell types. Organoids generated from villin-Cre-  
364 Ap1m2<sup>flox/flox</sup> were treated with or without tamoxifen and the loss of AP-1B was  
365 controlled by qPCR (Figure 5C) (see method). AP-1B<sup>+/+</sup> and AP-1B<sup>-/-</sup> organoids  
366 were seeded onto transwells and infected apically or basolaterally with MRV.  
367 The innate immune induction was controlled by q-RT-PCR and confirmed that  
368 similar to our T84 cell model and to our human organoids, murine organoids  
369 also show a polarized immune response where a basolateral stimulation leads to  
370 a stronger production of IFN compared to an apical one (Figure 5D). Most  
371 importantly, organoids derived from AP-1B floxed mice also display an inversion  
372 in their polarized immune response upon tamoxifen-induced knock-out of AP-  
373 1B. Indeed, apical infection leads to the expression of higher amounts of IFN and  
374 interferon stimulated genes compared to organoids derived from WT mice (data  
375 not shown) or to the Ap1b<sup>+/+</sup> (floxed non-tamoxifen treated organoids) (Figure  
376 5D).

377 All together these results indicate that in the absence of AP-1B, response  
378 emanating from an apical stimuli is exacerbated. This highlights the key role of  
379 the AP-1-mediated cellular polarity in regulating intrinsic innate immune  
380 response in IECs.

381 **AP-1B mediated sorting is responsible for the TLR3-mediated polarized**  
382 **immune response.** We and others have previously demonstrated that MRV is

383 detected by both the RLRs MDA-5 and RIG-I as well as TLR3 (Stanifer et al., 2016,  
384 Loo et al., 2008). To determine if AP-1B establishes a polarized immune response  
385 through sorting of RLRs and/or TLRs, we infected polarized T84 WT or AP-1B  
386 knock-down cells with Mengo virus, which is known to activate its immune  
387 response through the RLR pathway only (Feng et al., 2012). Unlike during MRV  
388 infection, apical infection of AP-1B knock-down cells by Mengo viruses did not  
389 lead to a stronger immune response compared to a basolateral infection. In other  
390 words, the innate immune induction of Mengo infected cells was unaltered in AP-  
391 1B knock-down cells compared to wild type cells (Figure 6A). Similarly,  
392 transfected poly I:C induced a similar production of  $\text{INF}\lambda_{2/3}$  in both wild type  
393 and AP-1B knock-down cells (Figure 6B) and activation of STING by cGAMP was  
394 also unaffected by AP-1B depletion (data not shown). These findings  
395 demonstrate that the AP-1 recycling machinery is not involved in the functional  
396 polarization of RLRs and STING.

397         The above results strongly suggest a model where the moderate and  
398 controlled immune response observed upon apical viral infection is highly  
399 dependent on TLR3 signaling. TLR3 requires TRIF as adapter protein to mediate  
400 downstream signaling (Yamamoto et al., 2003). To address whether the antiviral  
401 innate immune response generated hIECs upon viral infection from their apical  
402 side is due to TLR3, we treated our polarized WT T84 cells with an inhibitor of  
403 TRIF, thereby blocking TLR3-mediated immune response, and subsequently  
404 infected them in a polarized manner with MRV. In the presence of the TRIF  
405 inhibitor, production of  $\text{INF}\lambda_{2/3}$  was strongly reduced in WT cells infected from  
406 their apical side (Figure 6C, left panel). Similarly, results show that TLR3 was

407 also responsible for sensing MRV infection emanating from the basolateral side  
408 of hIECs, but to a lesser extent compared to an apical infection (Figure 6C, right  
409 panel). Similar results were found when monitoring  $INF\beta 1$  (data not shown).  
410 This strongly suggests that RLRs and TLR3 might both be responsible for the  
411 antiviral signaling observed during basolateral infection while TLR3 might be the  
412 predominant sensing pathway of an apical viral infection.

413 To directly challenge this hypothesis, we exploited our AP-1B knock-  
414 down cells and addressed whether the exacerbated immune response observed  
415 upon apical infection of hIECs (Figure 5) was driven by TLR3. AP-1B knock-down  
416 cells were infected apically or basolaterally with MRV in the presence or absence  
417 of the TRIF inhibitor, and the induction of  $INF\lambda 2/3$  transcripts was followed over  
418 time by q-RT-PCR. Remarkably, while infection of AP-1B knock-down cells from  
419 their apical side leads to an exacerbated immune response, the presence of the  
420 TRIF inhibitor results in significant decrease of immune response almost  
421 comparable to the levels observed in WT cells (Figure 6D). These findings  
422 strongly suggest that the exacerbated immune response observed in AP-1B  
423 knock down cells is mediated by TLR3. All together these data support a model  
424 where the clathrin sorting adaptor AP-1B allows for the functional polarization  
425 of TLR3 allowing hIECs to mount a side specific immune response upon viral  
426 infection.

427

428

429

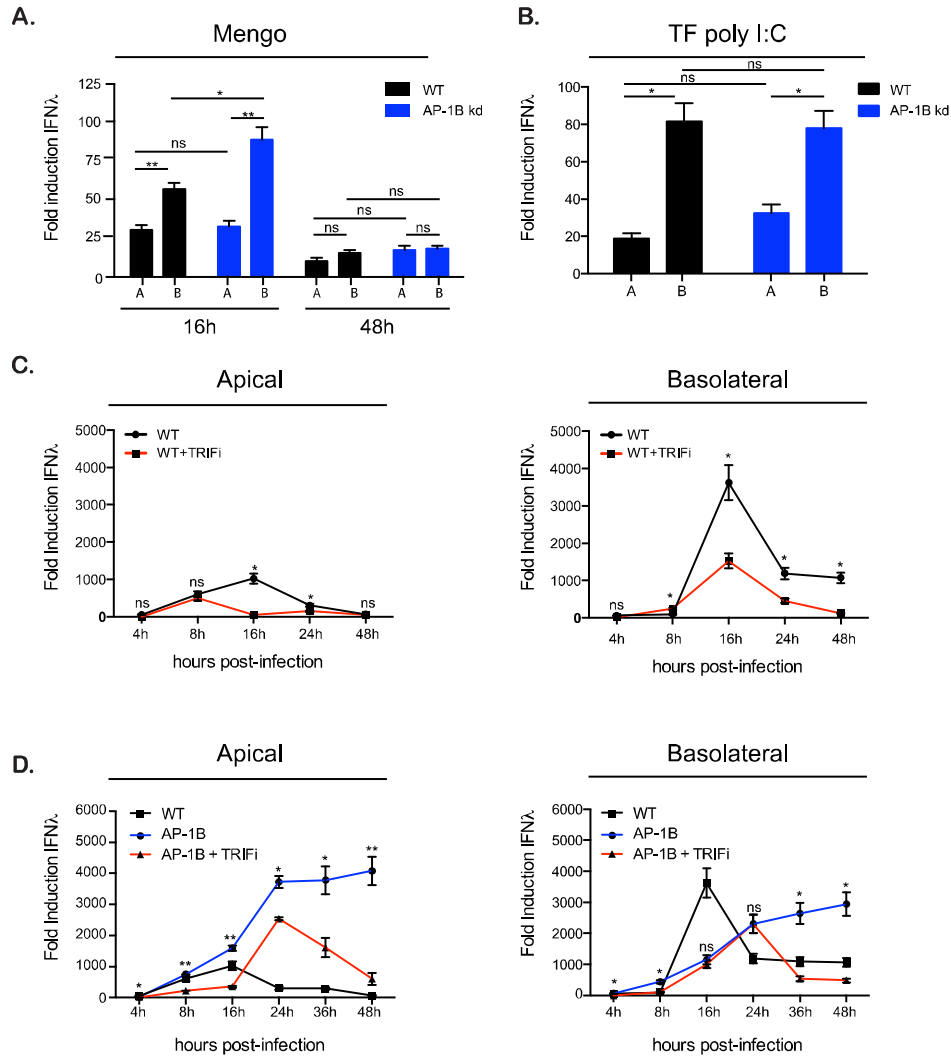

**Figure 6. AP-1-mediated cellular polarity shapes TLR3 driven immune response.** (A). WT and AP-1B knock-down T84 cells were polarized on transwell inserts. Cells were infected with EMCV Mengovirus and harvested at 16 and 48 hpi and analyzed for intrinsic immune induction of type III IFNs by qRT-PCR. (B) Same as A except cells were transfected with poly I:C and harvested at 12 hours post-treatment. (C-D) Cells were treated with a TRIF inhibitor or a control peptide. RNA samples were harvested at indicated time points post-MRV infection and the intrinsic innate immune induction was analyzed by qPCR for type III (IFN $\lambda_2/3$ ) interferons. (C) WT cells (D) AP-1B kd cells. (A-D). All experiments were performed in triplicate. Error bars indicate the standard deviation. ns=not significant, \* P < 0.05. \*\* P < 0.01. Statistics in panel D are between AP-1B and AP-1B+TRIF.

430

431

432

433



434 **Discussion**

435           The microbial content present in the lumen of gut represents a colossal  
436 challenge for IECs lining our gastrointestinal tract. On one hand, they need to  
437 cohabitate to exploit the benefit that the commensal flora brings to the host, but  
438 on the other hand, they need to remain immune responsive to deal with potential  
439 pathogens (Pott and Hornef, 2012). In this study we show that polarized IECs can  
440 distinguish between pathogen challenges emanating from their apical or  
441 basolateral side. We unraveled that the extent of the immune response which is  
442 generated downstream both endosomal and cytosolic PRRs depends on the side  
443 (apical vs. basolateral) of infection/stimulation. Precisely, we show that  
444 basolateral infection/stimulation leads to a higher induction and secretion of  
445  $\text{INF}\lambda 2/3$  compared to an apical infection. We identified the clathrin adaptor AP-  
446 1B sorting machinery as a key player driving the polarized innate immune  
447 response in IECs upon viral infection. We show that the AP-1B sorting machinery  
448 allows for the asymmetric functional polarization of TLR3, allowing IECs to be  
449 more responsive from their basolateral side. Interference with this sorting  
450 mechanism renders IECs more sensitive to apical stimuli. We propose that the  
451 polarized immune response generated by IECs against the broad range of PAMPs  
452 and pathogens represents a unique immune-strategy to create a homeostatic  
453 interface between the microbiota and the intestinal epithelial barrier. It allows  
454 IECs to restrain their immune response against the naturally present apical  
455 stimuli while remaining fully responsive to infection/stimulation emanating  
456 from the physiologically sterile basolateral side, which will only be accessible  
457 during loss of barrier function or during infection by invasive pathogens.

458

459           Only a few studies have tried to correlate the specific localization of TLRs  
460 at the apical and basolateral side of IECs with their capacity to respond to  
461 luminal PAMPs. TLR5 has been shown to be located on the basolateral  
462 membrane, which was suggested to be critical to limit overstimulation of IECs by  
463 the commensal bacterial components flagellin (Gewirtz et al., 2001). TLR2 and 4  
464 have been described as being constitutively localized to the apical side of  
465 intestinal cells. Upon stimulation with LPS or peptiglycan, TLR2 and TLR4 have  
466 been seen to traffic to cellular compartments near the basolateral membrane  
467 (Cario et al., 2002, Hiemstra et al., 2015). It has been suggested that this  
468 trafficking is a mechanism used by IECs to transmit information from the lumen  
469 into underlying the immune cells of the lamina propria (Hiemstra et al., 2015).  
470 Additionally, TLR9 was shown to be located in both the apical and basolateral  
471 membranes but has been described to signal in a polarized manner. Basolateral  
472 stimulation of TLR9 leads to NFkB activation and the induction of an immune  
473 response however, apical stimulation leads to the ubiquitination of Ikb $\alpha$  which  
474 causes it to accumulate therefore blocking apical signaling (Lee et al., 2006).

475           However, a recent study using transgenic mice expressing fluorescently  
476 labeled TLR 2, 4, 5, 7, and 9 has challenged many of these past models (Price et  
477 al., 2018). The current model suggests that to achieve homeostasis, which we  
478 define here as co-habitation of IECs with the commensal flora, TLRs are  
479 preferentially localized to specific sections in the GI tract as opposed to being  
480 polarized towards the basolateral side of epithelium cells. It was shown that  
481 TLR2, 4, and 5 were expressed at very low levels in the small intestine and at  
482 much higher levels in the colon. These three TLRs were found to be localized on  
483 both the apical and basolateral membranes. Interestingly, this study also showed

484 that TLR7 and 9 were absent from the epithelium and their expression was  
485 limited to underlying immune cells. In such a model the longitudinal expression  
486 patterns of TLRs along the GI tract might be adapted to the specific local  
487 composition of the commensal flora and imbalances in their expression might  
488 lead to the disruption of intestinal homeostasis. Alterations in the longitudinal  
489 expression pattern of TLRs appears to be associated with pathologies and  
490 sensitivity to enteric pathogens. It has been shown that suckling mice are more  
491 susceptible to rotavirus infection due to low levels of TLR3. As mice age, they  
492 increase TLR3 expression within the intestinal tract and become asymptomatic  
493 to rotavirus infection (Pott et al., 2012). Adult mice which lack TLR3 or its  
494 adapter TRIF increased their viral shedding and show a reduced immune  
495 induction indicating that TLR3 is important for controlling viral pathogens in an  
496 age-dependent manner. TLR5 and 4 have also been shown to be critical for  
497 intestinal homeostasis. Mice lacking TLR5 expression display dysbiosis,  
498 metabolic disorders, and low-grade inflammation of the intestinal tract. Using  
499 intestinal specific knock-out of TLR5 it was shown that these symptoms were  
500 based on the epithelial cells and not to underlying immune cells suggesting that  
501 loss of TLR5 leads to an imbalance of the immune response generated in IECs  
502 (Chassaing et al., 2014). Similarly, TLR4 overexpression leads to increased  
503 severity of chemically induced colitis, increased inflammation and infiltration of  
504 neutrophils. Additionally, TLR4 expression is associated with colitis-induced  
505 cancers in human patients (Fukata et al., 2011).

506 To date no reports have directly visualized the distribution of TLR3  
507 within the GI tract but sequencing data support a model where TLR3 is  
508 expressed at similar levels in the different intestinal sections (Price et al., 2018,

509 Pott et al., 2012). As such it remains unclear whether or not TLR3 signaling is  
510 specifically tailored to adapt to the challenges resulting from the commensal  
511 flora/epithelium interface. In our work we clearly show that TLR3 displays a  
512 polarized functionality independently of its location within the GI tract. We  
513 found that basolateral infection leads to a stronger immune response in  
514 organoids derived from duodenum, ileum and colon (Figure 3 and data not  
515 shown). This demonstrates that IECs not only regulate expression and  
516 downstream signal transduction of plasma membrane associated TLRs but also  
517 endosomal TLRs.

518 We report that the clathrin sorting adaptor protein AP-1B is responsible  
519 for the observed polarized immune response generated downstream TLR3. On  
520 one hand AP-1B allows cells to mount a stronger immune response upon  
521 basolateral viral infection and on the other hand it provides cells the capacity of  
522 quickly downregulating the immune response upon apical viral challenges  
523 (Figure 5). The function of clathrin adapter proteins in participating in the  
524 regulation of TLR-mediated signaling was previously reported. Adapter protein  
525 AP-3, has been shown to be critical for sorting of TLR 4 in DC and TLR7 and 9 in  
526 pDCs (Mantegazza et al., 2012, Blasius et al., 2010). In the absence of AP-3 TLR7  
527 and 9 are unable to produce type I IFN and TLR4s recruitment and signaling  
528 from phagosomes is impaired, demonstrating that clathrin adapter protein  
529 mediated sorting of TLRs directly influences the outcome of signal transduction.  
530 Additionally, AP-1 sigma1c mutations have been found in patients that exhibit a  
531 severe auto inflammatory skin disorder and it is suggested that this is due to  
532 misregulation of the TLR3 receptor further supporting our model of a key role  
533 for AP-1 in TLR3 signaling (Setta-Kaffetzi et al., 2014).

534           Interestingly we found that EMCV Mengo, which activates only RLRs,  
535 transfected poly I:C and the STING agonist 2'3'cGAMP all elicited a polarized  
536 immune induction which showed a higher induction of type I and III IFNs from  
537 basolateral stimulation. This demonstrates that RLR signaling is also polarized in  
538 IECs. By exploiting cells in which AP-1B was knocked-down we could show that  
539 cells mount a strong immune response following TLR3 activation from the apical  
540 infection. On the contrary, interfering with the AP-1B sorting machinery did not  
541 alter neither RLR- nor STING- mediated signaling. This demonstrates that the  
542 clathrin adapter AP-1B sorting machinery does not mediate the polarized  
543 immune response generated by RLR or STING.

544           While it is clear that polarized RLRs are independent of AP-1B it is  
545 unclear how cytosolic molecules could be polarized. Polarized cells are known to  
546 organize their cytoplasm in a distinct architecture where the nucleus sits closer  
547 to the basolateral membrane while the ER and the microtubule organizing center  
548 are juxtaposed to the nucleus but facing the apical side. This suggest that the  
549 physical nature of polarized cells could allow for segregating cytosolic  
550 components involved in intrinsic innate immune sensing and signaling,  
551 participating in the establishment of a polarized response. We have previously  
552 shown that peroxisomes preferentially produce type III IFN (Odendall et al.,  
553 2014). When evaluating the localization of peroxisomes in polarized cells we  
554 could detect them dispersed through the basolateral cytosol but they were  
555 excluded from the apical portion of the cell suggesting that they also show a  
556 physical restriction allowing for their activation due to the delivery of  
557 basolateral stimuli in a closer proximity to the sensors (data not shown).

558           Due to the challenge associated with the commensal  
559 microbiota/epithelium interface, IECs finely tune their intrinsic immune system.  
560 Regulation can be found at the quantitative level by selecting the expression of a  
561 subset of TLRs or can be achieved by creating a uniquely tailored response that  
562 allows for directional partial tolerance of commensals. We propose that in  
563 addition to plasma membrane-associated TLRs, IECs also functionally polarize  
564 intracellular and cytosolic PRRs. This polarization of function is intrinsically  
565 linked to the polarized nature of the cell and allows for TLR3, RLRs, and STING to  
566 strongly respond to basolateral challenges while limiting response to apical  
567 challenges (Figure 7). Importantly, AP-1B knock-out mice show an increase in  
568 inflammation and infiltration of CD4<sup>+</sup> T cells due to an overreaction of IECs  
569 against the commensal flora (Takahashi et al., 2011). In the line with our results  
570 that AP-1B functionally polarizes PRR sensing and signaling, we propose that  
571 within the physiological organization of the gut, this side specific polarized  
572 immune response of IECs participates in the tolerance of the commensal flora  
573 located in the lumen while remaining responsive to invading pathogens that will  
574 gain access to the sterile basolateral side (Figure 7).

575

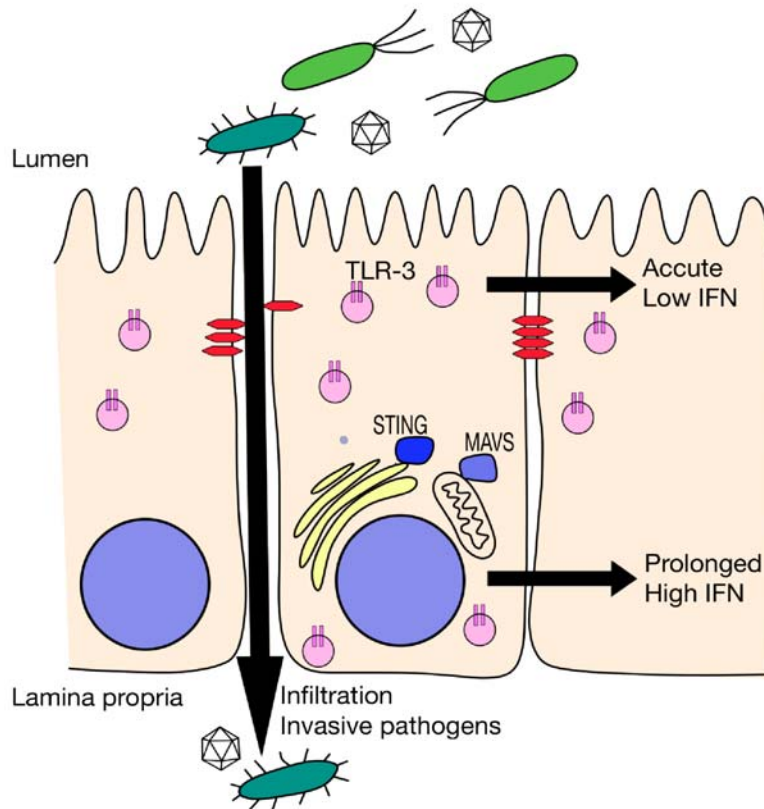

**Figure 7. Apical stimulation is sensed by TLR3 and basolateral stimulation is sensed by a combination of TLR3 and RLR pathways.** Model showing the acute, mild IFN sensing of commensal/pathogenic stimuli from the apical membrane compared to the high and prolonged IFN production from basolateral sensing after barrier breakdown/infiltration. Endosomes expressing TLR-3 are shown in pink, tight junctions are shown in red, ER-localized STING and mitochondrial MAVS are shown in blue.

577 **Acknowledgments**

578           This work was supported by a research grant from Chica and Heinz  
579 Schaller Foundation and Deutsche Forschungsgemeinschaft (DFG) in SFB1129  
580 (Project 14) to SB. This project has received funding from the European Union's  
581 Seventh Framework Programme under grant agreement no 334336 (FP7-  
582 PEOPLE-2012-CIG). MS was supported by the Olympia Morata Fellowship from  
583 Heidelberg University Hospital, the Brigitte-Schlieben Lange Program from the  
584 state of Baden Württemberg, Germany and the Dual Career Support from  
585 CellNetworks, Heidelberg, Germany. We would like to thank Frank van  
586 Kuppeveld from Utrecht University for the EMCV Mengo virus.

587

588 **Author Contributions**

589 SB<sup>a</sup>=Steeve Boulant , SB<sup>b</sup>=Sina Bartfeld  
590 MLS and SB<sup>a</sup> designed experiments, MLS, SM, KP, MM and DA performed  
591 experiments, MLS analyzed data, TK and HO generated the KO mice organoids,  
592 CO and JK assisted in establishing polarized infection. SB<sup>b</sup> designed and  
593 performed microinjection, MLS and SB<sup>a</sup> wrote the manuscript. The final version  
594 of the manuscript was approved by all authors.

595

596 **Declaration of Interests**

597 The authors declare no competing interests.

598



599 **References**

- 600 ARPAIA, N. & BARTON, G. M. 2011. Toll-like receptors: key players in antiviral  
601 immunity. *Curr Opin Virol*, 1, 447-54.
- 602 BARTFELD, S. & CLEVERS, H. 2015. Organoids as Model for Infectious Diseases:  
603 Culture of Human and Murine Stomach Organoids and Microinjection of  
604 *Helicobacter Pylori*. *J Vis Exp*.
- 605 BARTON, G. M. & MEDZHITOV, R. 2003. Toll-like receptor signaling pathways.  
606 *Science*, 300, 1524-5.
- 607 BLASIUS, A. L., ARNOLD, C. N., GEORGEL, P., RUTSCHMANN, S., XIA, Y., LIN, P.,  
608 ROSS, C., LI, X., SMART, N. G. & BEUTLER, B. 2010. Slc15a4, AP-3, and  
609 Hermansky-Pudlak syndrome proteins are required for Toll-like receptor  
610 signaling in plasmacytoid dendritic cells. *Proc Natl Acad Sci U S A*, 107,  
611 19973-8.
- 612 BROERING, T. J., MCCUTCHEON, A. M., CENTONZE, V. E. & NIBERT, M. L. 2000.  
613 Reovirus nonstructural protein muNS binds to core particles but does not  
614 inhibit their transcription and capping activities. *J Virol*, 74, 5516-24.
- 615 CARIO, E., BROWN, D., MCKEE, M., LYNCH-DEVANEY, K., GERKEN, G. &  
616 PODOLSKY, D. K. 2002. Commensal-associated molecular patterns induce  
617 selective toll-like receptor-trafficking from apical membrane to  
618 cytoplasmic compartments in polarized intestinal epithelium. *Am J Pathol*,  
619 160, 165-73.
- 620 CHASSAING, B., LEY, R. E. & GEWIRTZ, A. T. 2014. Intestinal epithelial cell toll-  
621 like receptor 5 regulates the intestinal microbiota to prevent low-grade  
622 inflammation and metabolic syndrome in mice. *Gastroenterology*, 147,  
623 1363-77 e17.
- 624 CHOW, J., FRANZ, K. M. & KAGAN, J. C. 2015. PRRs are watching you: Localization  
625 of innate sensing and signaling regulators. *Virology*, 479-480, 104-9.
- 626 DE MATTEIS, M. A. & LUINI, A. 2008. Exiting the Golgi complex. *Nat Rev Mol Cell*  
627 *Biol*, 9, 273-84.
- 628 FENG, Q., HATO, S. V., LANGEREIS, M. A., ZOLL, J., VIRGEN-SLANE, R., PEISLEY, A.,  
629 HUR, S., SEMLER, B. L., VAN RIJ, R. P. & VAN KUPPEVELD, F. J. 2012. MDA5  
630 detects the double-stranded RNA replicative form in picornavirus-  
631 infected cells. *Cell Rep*, 2, 1187-96.
- 632 FOLSCH, H. 2015. Role of the epithelial cell-specific clathrin adaptor complex AP-  
633 1B in cell polarity. *Cell Logist*, 5, e1074331.
- 634 FUKATA, M. & ARDITI, M. 2013. The role of pattern recognition receptors in  
635 intestinal inflammation. *Mucosal Immunol*, 6, 451-63.
- 636 FUKATA, M., SHANG, L., SANTAOLALLA, R., SOTOLONGO, J., PASTORINI, C.,  
637 ESPANA, C., UNGARO, R., HARPAZ, N., COOPER, H. S., ELSON, G., KOSCO-  
638 VILBOIS, M., ZAIAS, J., PEREZ, M. T., MAYER, L., VAMADEVAN, A. S., LIRA,  
639 S. A. & ABREU, M. T. 2011. Constitutive activation of epithelial TLR4  
640 augments inflammatory responses to mucosal injury and drives colitis-  
641 associated tumorigenesis. *Inflamm Bowel Dis*, 17, 1464-73.
- 642 GEWIRTZ, A. T., NAVAS, T. A., LYONS, S., GODOWSKI, P. J. & MADARA, J. L. 2001.  
643 Cutting edge: bacterial flagellin activates basolaterally expressed TLR5 to  
644 induce epithelial proinflammatory gene expression. *J Immunol*, 167, 1882-  
645 5.

- 646 GONZALEZ, A. & RODRIGUEZ-BOULAN, E. 2009. Clathrin and AP1B: key roles in  
647 basolateral trafficking through trans-endosomal routes. *FEBS Lett*, 583,  
648 3784-95.
- 649 HASE, K., NAKATSU, F., OHMAE, M., SUGIHARA, K., SHIODA, N., TAKAHASHI, D.,  
650 OBATA, Y., FURUSAWA, Y., FUJIMURA, Y., YAMASHITA, T., FUKUDA, S.,  
651 OKAMOTO, H., ASANO, M., YONEMURA, S. & OHNO, H. 2013. AP-1B-  
652 mediated protein sorting regulates polarity and proliferation of intestinal  
653 epithelial cells in mice. *Gastroenterology*, 145, 625-35.
- 654 HIEMSTRA, I. H., VRIJLAND, K., HOGENBOOM, M. M., BOUMA, G., KRAAL, G. &  
655 DEN HAAN, J. M. 2015. Intestinal epithelial cell transported TLR2 ligand  
656 stimulates Ly6C(+) monocyte differentiation in a G-CSF dependent  
657 manner. *Immunobiology*, 220, 1255-65.
- 658 KAGAN, J. C. & BARTON, G. M. 2014. Emerging principles governing signal  
659 transduction by pattern-recognition receptors. *Cold Spring Harb Perspect*  
660 *Biol*, 7, a016253.
- 661 KANAYA, T., SAKAKIBARA, S., JINNOHARA, T., HACHISUKA, M., TACHIBANA, N.,  
662 HIDANO, S., KOBAYASHI, T., KIMURA, S., IWANAGA, T., NAKAGAWA, T.,  
663 KATSUNO, T., KATO, N., AKIYAMA, T., SATO, T., WILLIAMS, I. R. & OHNO,  
664 H. 2018. Development of intestinal M cells and follicle-associated  
665 epithelium is regulated by TRAF6-mediated NF-kappaB signaling. *J Exp*  
666 *Med*, 215, 501-519.
- 667 LE BIVIC, A., REAL, F. X. & RODRIGUEZ-BOULAN, E. 1989. Vectorial targeting of  
668 apical and basolateral plasma membrane proteins in a human  
669 adenocarcinoma epithelial cell line. *Proc Natl Acad Sci U S A*, 86, 9313-7.
- 670 LEE, J., MO, J. H., KATAKURA, K., ALKALAY, I., RUCKER, A. N., LIU, Y. T., LEE, H. K.,  
671 SHEN, C., COJOCARU, G., SHENOUDA, S., KAGNOFF, M., ECKMANN, L., BEN-  
672 NERIAH, Y. & RAZ, E. 2006. Maintenance of colonic homeostasis by  
673 distinctive apical TLR9 signalling in intestinal epithelial cells. *Nat Cell Biol*,  
674 8, 1327-36.
- 675 LOO, Y. M., FORNEK, J., CROCHET, N., BAJWA, G., PERWITASARI, O., MARTINEZ-  
676 SOBRIDO, L., AKIRA, S., GILL, M. A., GARCIA-SASTRE, A., KATZE, M. G. &  
677 GALE, M., JR. 2008. Distinct RIG-I and MDA5 signaling by RNA viruses in  
678 innate immunity. *J Virol*, 82, 335-45.
- 679 MADARA, J. L., STAFFORD, J., DHARMSATHAPHORN, K. & CARLSON, S. 1987.  
680 Structural analysis of a human intestinal epithelial cell line.  
681 *Gastroenterology*, 92, 1133-45.
- 682 MANTEGAZZA, A. R., GUTTENTAG, S. H., EL-BENNA, J., SASAI, M., IWASAKI, A.,  
683 SHEN, H., LAUFER, T. M. & MARKS, M. S. 2012. Adaptor protein-3 in  
684 dendritic cells facilitates phagosomal toll-like receptor signaling and  
685 antigen presentation to CD4(+) T cells. *Immunity*, 36, 782-94.
- 686 ODENDALL, C., DIXIT, E., STAVRU, F., BIERNE, H., FRANZ, K. M., DURBIN, A. F.,  
687 BOULANT, S., GEHRKE, L., COSSART, P. & KAGAN, J. C. 2014. Diverse  
688 intracellular pathogens activate type III interferon expression from  
689 peroxisomes. *Nat Immunol*, 15, 717-26.
- 690 ODENDALL, C. & KAGAN, J. C. 2017. Activation and pathogenic manipulation of  
691 the sensors of the innate immune system. *Microbes Infect*, 19, 229-237.
- 692 PERVOLARAKI, K., STANIFER, M. L., MUNCHAU, S., RENN, L. A., ALBRECHT, D.,  
693 KURZHALS, S., SENIS, E., GRIMM, D., SCHRODER-BRAUNSTEIN, J., RABIN,  
694 R. L. & BOULANT, S. 2017. Type I and Type III Interferons Display

- 695 Different Dependency on Mitogen-Activated Protein Kinases to Mount an  
696 Antiviral State in the Human Gut. *Front Immunol*, 8, 459.
- 697 PETERSON, L. W. & ARTIS, D. 2014. Intestinal epithelial cells: regulators of  
698 barrier function and immune homeostasis. *Nat Rev Immunol*, 14, 141-53.
- 699 POTT, J. & HORNEF, M. 2012. Innate immune signalling at the intestinal  
700 epithelium in homeostasis and disease. *EMBO Rep*, 13, 684-98.
- 701 POTT, J., STOCKINGER, S., TOROW, N., SMOCZEK, A., LINDNER, C., MCINERNEY,  
702 G., BACKHED, F., BAUMANN, U., PABST, O., BLEICH, A. & HORNEF, M. W.  
703 2012. Age-dependent TLR3 expression of the intestinal epithelium  
704 contributes to rotavirus susceptibility. *PLoS Pathog*, 8, e1002670.
- 705 PRICE, A. E., SHAMARDANI, K., LUGO, K. A., DEGUINE, J., ROBERTS, A. W., LEE, B.  
706 L. & BARTON, G. M. 2018. A Map of Toll-like Receptor Expression in the  
707 Intestinal Epithelium Reveals Distinct Spatial, Cell Type-Specific, and  
708 Temporal Patterns. *Immunity*, 49, 560-575 e6.
- 709 RODRIGUEZ-BOULAN, E. & MACARA, I. G. 2014. Organization and execution of  
710 the epithelial polarity programme. *Nat Rev Mol Cell Biol*, 15, 225-42.
- 711 SETTA-KAFFETZI, N., SIMPSON, M. A., NAVARINI, A. A., PATEL, V. M., LU, H. C.,  
712 ALLEN, M. H., DUCKWORTH, M., BACHELEZ, H., BURDEN, A. D., CHOON, S.  
713 E., GRIFFITHS, C. E., KIRBY, B., KOLIOS, A., SEYGER, M. M., PRINS, C.,  
714 SMAHI, A., TREMBATH, R. C., FRATERNALI, F., SMITH, C. H., BARKER, J. N.  
715 & CAPON, F. 2014. AP1S3 mutations are associated with pustular  
716 psoriasis and impaired Toll-like receptor 3 trafficking. *Am J Hum Genet*,  
717 94, 790-7.
- 718 STANIFER, M. L., KISCHNICK, C., RIPPERT, A., ALBRECHT, D. & BOULANT, S.  
719 2017. Reovirus inhibits interferon production by sequestering IRF3 into  
720 viral factories. *Sci Rep*, 7, 10873.
- 721 STANIFER, M. L., RIPPERT, A., KAZAKOV, A., WILLEMSSEN, J., BUCHER, D.,  
722 BENDER, S., BARTENSCHLAGER, R., BINDER, M. & BOULANT, S. 2016.  
723 Reovirus intermediate subviral particles constitute a strategy to infect  
724 intestinal epithelial cells by exploiting TGF-beta dependent pro-survival  
725 signaling. *Cell Microbiol*, 18, 1831-1845.
- 726 STURZENBECKER, L. J., NIBERT, M., FURLONG, D. & FIELDS, B. N. 1987.  
727 Intracellular digestion of reovirus particles requires a low pH and is an  
728 essential step in the viral infectious cycle. *J Virol*, 61, 2351-61.
- 729 TAKAHASHI, D., HASE, K., KIMURA, S., NAKATSU, F., OHMAE, M., MANDAI, Y.,  
730 SATO, T., DATE, Y., EBISAWA, M., KATO, T., OBATA, Y., FUKUDA, S.,  
731 KAWAMURA, Y. I., DOHI, T., KATSUNO, T., YOKOSUKA, O., WAGURI, S. &  
732 OHNO, H. 2011. The epithelia-specific membrane trafficking factor AP-1B  
733 controls gut immune homeostasis in mice. *Gastroenterology*, 141, 621-32.
- 734 WEISZ, O. A. & RODRIGUEZ-BOULAN, E. 2009. Apical trafficking in epithelial  
735 cells: signals, clusters and motors. *J Cell Sci*, 122, 4253-66.
- 736 WOLF, J. L., RUBIN, D. H., FINBERG, R., KAUFFMAN, R. S., SHARPE, A. H., TRIER, J.  
737 S. & FIELDS, B. N. 1981. Intestinal M cells: a pathway for entry of reovirus  
738 into the host. *Science*, 212, 471-2.
- 739 YAMAMOTO, M., SATO, S., HEMMI, H., HOSHINO, K., KAISHO, T., SANJO, H.,  
740 TAKEUCHI, O., SUGIYAMA, M., OKABE, M., TAKEDA, K. & AKIRA, S. 2003.  
741 Role of adaptor TRIF in the MyD88-independent toll-like receptor  
742 signaling pathway. *Science*, 301, 640-3.

743 YU, S. & GAO, N. 2015. Compartmentalizing intestinal epithelial cell toll-like  
744 receptors for immune surveillance. *Cell Mol Life Sci*, 72, 3343-53.  
745  
746

747 **STAR methods:**

748

749 **Cell and Viruses.** T84 human colon carcinoma cells (ATCC CCL-248) were  
750 maintained in a 50:50 mixture of Dulbecco's modified Eagle's medium (DMEM)  
751 and F12 (GibCo) supplemented with 10% fetal bovine serum and 1%  
752 penicillin/streptomycin (Gibco). Reovirus strains Type 3 clone 9 (T3C9) derived  
753 from stocks originally obtained from Bernard N. Fields were grown and purified  
754 by standard protocols (Sturzenbecker et al., 1987). EMCV Mengo was a kind gift  
755 from Frank van Kuppeveld (Utrecht University) and Salmonella  
756 STm\_14028\_mCherry was a kind gift from Typas lab (EMBL Heidelberg).

757

758 **Antibodies and Inhibitors.** Rabbit polyclonal antibody against MRV uNS used at  
759 1/1000 for immunostaining and western blots (Broering et al., 2000); ZO-1  
760 (Santa Cruz Biotechnology) used at 1/100 for immunostaining; actin (Sigma-  
761 Aldrich) used 1/2000 for western blots; J2 antibody was used at 1:250 for  
762 detection of dsRNA. Secondary antibodies were conjugated with AF568  
763 (Molecular Probes), CW800 (Li-Cor) or HRP (Sigma-Aldrich) directed against the  
764 animal source. HMW and LMW poly I:C (Peprotech) were used in a 50:50 ratio at  
765 a final concentration of 1 µg/mL and were delivered to the cells through  
766 transfection as previously described (Stanifer et al., 2017). 2'3'-cGAMP  
767 (Invivogen) was added directly to the media and was used at a final  
768 concentration 10ug/mL. TRIF peptide inhibitor was used at a final concentration  
769 of 25uM (Invivogen). Actinomycin D (Sigma) was used at a final concentration of  
770 4ug/mL.

771

772 **Viral infections.** All MRV and EMCV infections were performed at an MOI of 1.  
773 Media was removed from transwells and virus containing media was added to  
774 either the apical or basolateral side. Virus was maintained for the course of the  
775 experiment.

776

777 **Bacterial infection.** *Salmonella enterica serovar typhimurium* was streaked out  
778 on a LB plate containing carbenicilin and incubate at 37°C overnight. Single  
779 colonies were picked and inoculated into LB carbenicilin liquid cultures and  
780 were grown for 16h at 37°C with shaking. The OD578 of the liquid culture was  
781 read and then the samples were diluted 1:10 and incubated for an additional 4h  
782 at 37°C with shaking. OD578 was read every hour until reaching 1. Bacteria were  
783 collected, spun at 8,000xg for 5 mins. Bacteria were washed in 1XPBS and spun  
784 at 8,000xg for 5 mins. PBS was removed and bacteria were re-suspended in  
785 DMEM +1g/L glucose in the absence of antibiotics to a allow for a final MOI of  
786 100. Bacteria were added either apically or basolaterally to polarized T84 cells.  
787 Infection was incubated at 37°C for 30 mins. Bacteria were removed. Cells were  
788 washed 1x with DMEM containing 100ug/mL gentamicin. Media was replaced  
789 with DMEM containing gentamicin and samples were collected 8 hours post-  
790 infection for analysis.

791

792 **Polarization of T84 cells on transwell inserts.**  $1.2 \times 10^5$  T84 cells were seeded  
793 on polycarbonate transwell inserts (Corning, polycarbonate, 3.0  $\mu\text{M}$ ) in  
794 DMEM/F12 medium. Medium was replaced 24h post-seeding and every two  
795 days subsequently. The trans-epithelial electrical resistance (TEER) was tested  
796 as indicated with EVOM<sup>2</sup> apparatus (World Precision Instrument). When the

797 TEER reached 1000 Ohm/cm<sup>2</sup>, the T84 cells were considered polarized (Madara  
798 et al., 1987). Polarization was controlled by immunostaining of the tight junction  
799 protein ZO-1 (see indirect immunofluorescence assay).

800

801 **RNA isolation, cDNA, and qPCR.** RNA was harvested from cells using  
802 NucleoSpin RNA extraction kit (Machery-Nagel) as per manufactures  
803 instructions. cDNA was made using iSCRIPT reverse transcriptase (BioRad) from  
804 250ng of total RNA as per manufactures instructions. q-RT-PCR was performed  
805 using SsoAdvanced SYBR green (BioRad) as per manufacturer's instructions, TBP  
806 and HPRT1 were used as normalizing genes.

807

808 **Western blot.** At time of harvest, media was removed, cells were rinsed one  
809 time with 1X PBS and lysed with 1X RIPA (150 mM sodium chloride, 1.0% Triton  
810 X-100, 0.5% sodium deoxycholate, 0.1% sodium dodecyl sulphate (SDS), 50 mM  
811 Tris, pH 8.0 with phosphatase and protease inhibitors (Sigma-Aldrich)) for  
812 5mins at RT. Lysates were collected and equal protein amounts were separated  
813 by SDS-PAGE and blotted onto a nitrocellulose membrane by wet-blotting (Bio-  
814 Rad, Germany). Membranes were blocked with 5% milk or 5% BSA in TBS  
815 containing 0.1% Tween 20 (TBS-T) for one hour at room temperature. Primary  
816 antibodies were diluted in blocking buffer and incubated overnight at 4°C.  
817 Membranes were washed 3X in TBS-T for 5mins at RT. Secondary antibodies  
818 were diluted in blocking buffer and incubated at RT for 1h with rocking.  
819 Membranes were washed 3X in TBS-T for 5mins at RT. HRP detection reagent  
820 (GE Healthcare) was mixed 1:1 and incubated at RT for 5mins. Membranes were  
821 exposed to film and developed.

822

823 **Indirect Immunofluorescence Assay.** Polycarbonate transwell inserts were cut  
824 in half and fixed in 2% paraformaldehyde (PFA) for 20mins at room temperature  
825 (RT). Cells were washed and permeabilized in 0.5% Triton-X for 15 mins at RT.  
826 Primary antibodies were diluted in phosphate-buffered saline (PBS) and  
827 incubated for 1h at RT. Membranes were washed in 1X PBS three times and  
828 incubated with secondary antibodies for 45mins at RT. Membranes were washed  
829 in 1X PBS three times and mounted on slides with ProLong Gold DAPI  
830 (Molecular Probes). Cells were imaged by epifluorescence on a Nikon Eclipse Ti-  
831 S (Nikon) or by confocal tile scans on a Zeiss LSM 780 (Zeiss). ZO-1 images were  
832 acquired on an ERS 6 spinning disc confocal microscope and deconvolution was  
833 performed using Huygens Remote Manager.

834

835 **ELISA:** Supernatants were collected at time points indicated in figure legends.  
836 Supernatants were kept undiluted. INF $\lambda$ 2/3 was evaluated using the INF $\lambda$  2/3  
837 DIY ELISA (PBL Interferon source) for the basolateral supernatants only as we  
838 have previously shown that INF $\lambda$  is preferentially secreted to the basolateral  
839 compartment (Stanifer et al., 2016). ELISA was performed as per manufacturers  
840 instructions.

841

842 **Plaque Assay.** BSC-1 were seeded into 24-well plates at a density of  
843 200,000cells/well. 24-48h post-seeding when cells had reached 100%  
844 confluency, media was removed and cells were washed 1X with PBS+2mM MgCl<sub>2</sub>  
845 (PBS-M). Virus samples were harvested from infected T84 cells and were subject  
846 to three rounds of freezing and thawing. Samples were spun to remove cellular



847 debris and virus containing supernatants were diluted in 10-fold serial dilutions  
848 in PBS-M. Infection was allowed to proceed for 1h at RT with rocking every  
849 15mins. At the end of the incubation time, cells were overlaid with a 1:1 mixture  
850 of 2% agarose:2X 199 Media (Sigma-Aldrich) containing 10u µg/mL  
851 chymotrypsin. Cells were incubated at 37°C for 48h or until the appearance of  
852 plaques. Cells were fixed in 10% formaldehyde for 30min at RT. Plugs were  
853 removed and cells were stained with 0.5% crystal violet for 15min at RT. Crystal  
854 violet was removed and cells were washed with water. Plaques were counted  
855 and all samples were performed in triplicate.

856

857 **Dextran uptake assay.**  $1 \times 10^5$  T84 cells were grown on collagen coated  
858 transwell filters until reaching full polarization. At the indicated time the  
859 diffusion of FITC-labelled dextran was measured. FITC-labeled dextran (Sigma-  
860 Aldrich, 4 kDa) was to the apical surface at a final concentration of 2 mg/mL.  
861 After incubating for 3h 37°C, 100 µL aliquots of the basal media were collected  
862 and the fluorescence was measured with the FLUOstar Omega  
863 spectrofluorometer (BMG Labtech) at 495 nm. As positive control, fluorescence  
864 of 100 µL aliquot of a collagen coated but cell-free transwell filter was measured  
865 to assess maximum diffusion of FITC-labeled dextran.

866

867 **Human organoid cultures.** Human tissue was received from colon and small  
868 intestine resection from the University Hospital Heidelberg. This study was  
869 carried out in accordance with the recommendations of the University hospital  
870 Heidelberg with written informed consent from all subjects in accordance with  
871 the Declaration of Helsinki. All samples were received and maintained in an

872 anonymized manner. The protocol was approved by the “Ethics commission of  
873 the University Hospital Heidelberg” under the protocol S-443/2017. Stem cells  
874 containing crypts were isolated following 2mM EDTA dissociation of tissue  
875 sample for 1hr at 4°C. Crypts were spun and washed in ice cold PBS. Fractions  
876 enriched in crypts were filtered with 70uM filters and the fractions were  
877 observed under a light microscope. Fractions containing the highest number of  
878 crypts were pooled and spun again. The supernatant was removed and crypts  
879 were re-suspended in Matrigel. Crypts were passaged and maintained in basal  
880 and differentiation culture media (see table 1).

881

882 **Mouse organoids.** Mouse intestinal tissue was received from control floxed  
883 mice or mice expressing a floxed Ap1m2 gene as previously described (Kanaya et  
884 al., 2018). Organoids were harvested, passaged and maintained in cultures as  
885 previously described for the human organoids, except using mouse specific  
886 media conditions (see table 1). To obtain organoids lacking the Ap1m2 gene,  
887 organoids were treated with 20uM tamoxifen for 48h. Tamoxifen was removed  
888 and cells were allowed to recover and grow in normal mouse media.

889

890 **Microinjection.** Human colon organoids were microinjected adapting a  
891 previously published protocol (Bartfeld and Clevers, 2015). Microinjection was  
892 carried out in a sterile laminar flow hood (KoJair, Finnland) using a  
893 micromanipulator (Narishige) and microinjector (Eppendorf FemtoJet). In each  
894 well, 30 organoids were injected. The injection needle was placed either inside  
895 the organoid (apical infection), or outside the organoid (basal infection), but

896 both time in similar proximity to the epithelium. Pairs of inside and outside  
897 injections were on the same plate.

898

899 **Organoids on transwells.** Tranwells were coated with 2.5% collagen in PBS for  
900 1 hour prior to organoids seeding. Organoids were collected at a ratio of 100  
901 organoids/transwell. Collected organoids were spun at 450g for 5mins and the  
902 supernatant was removed. Organoids were washed 1X with cold PBS and spun at  
903 450g for 5mins. PBS was removed and organoids were digested with 0.5%  
904 Trypsin-EDTA (Life technologies) for 5 mins at 37°C. Digestion was stopped by  
905 addition of serum containing medium. Organoids were spun at 450g for 5mins  
906 and the supernatant was removed and organoids were re-suspended in normal  
907 growth media at a ratio of 100µL media/well. The PBS/matrigel mixture was  
908 removed from the transwells and 100 µL of organoids were added to each well.  
909 500uL of normal organoid media was added to the bottom chambers. 24 hours  
910 post-seeding media on both sides of the transwells was changed for  
911 differentiation media and the TEER was monitored over 5 days.

912

913 **RNA decay.** T84 cells were seeded onto a 24-well plate at a density of  
914 100,000cells/well. 24h post-seeding T84 cells were infected with MRV T3C9. 16  
915 hours post-infection, cells were treated with 4 µg/mL actinomycin D and RNA  
916 samples were collected at time points indicated in figure legend. RNA was  
917 harvested and qPCR as performed as described above.

918

919 **Production of Ap1 knock-down T84 cells.** AP-1B knock-down T84 cells were  
920 seeded onto 6-well plates in a density of 500,000cells/well. 24h post-seeding

921 cells were transduced with lentiviruses expressing an shRNA targeted for the  
922 Ap1m2 gene (sequence available upon request). 72h post-transduction,  
923 lentiviruses were removed and T84 cells were put under antibiotic selection.  
924 When all control cells had died, antibiotic selection was removed and T84 cells  
925 were allowed to re-grow. Knock-down was confirmed through qPCR.

926

927 **Statistics.** Statistical analysis was performed using the GraphPad Prism software  
928 package. Unpaired t-tests were performed as described in the results section.

929

930 **Table 1:** Human and mouse media components

| <i>Compound</i>                                                       | <i>Final concentration</i> |
|-----------------------------------------------------------------------|----------------------------|
| <b>Human Basal media</b>                                              |                            |
| Ad DMEM/F12<br>+GlutaMAX<br>+HEPES<br>+P/S                            |                            |
| L-WRN conditioned media<br>containing Wnt3A, R-<br>spondin and Noggin | 50% by volume              |
| B27                                                                   | 1:50                       |
| N2                                                                    | 1:100                      |
| N-acetyl-cysteine                                                     | 1mM                        |
| EGF                                                                   | 50ng/mL                    |
| Nicotinamide                                                          | 10mM                       |
| A83-01                                                                | 500nM                      |
| Sb202190                                                              | 10uM                       |
|                                                                       |                            |
| <b>Differentiation Media</b>                                          |                            |
| Ad DMEM/F12<br>+GlutaMAX<br>+HEPES<br>+P/S                            |                            |
| B27                                                                   | 1:50                       |
| N2                                                                    | 1:100                      |
| N-acetyl-cysteine                                                     | 1mM                        |
| R-spondin                                                             | 5% by volume               |
| Noggin                                                                | 50ng/mL                    |

|                                            |               |
|--------------------------------------------|---------------|
| EGF                                        | 50ng/mL       |
| Gastrin                                    | 10mM          |
| A83-01                                     | 500nM         |
| <b>Mouse Basal media</b>                   |               |
| Ad DMEM/F12<br>+GlutaMAX<br>+HEPES<br>+P/S |               |
| B27                                        | 1:50          |
| N2                                         | 1:100         |
| R-spondin                                  | 10% by volume |
| Noggin                                     | 100ng/mL      |
| EGF                                        | 50ng/mL       |

931
